# Supplementary material for: Coupled cobalt oxide/hollow carbon sphere as an efficient electrocatalyst for the oxygen reduction reaction
Source: Royal Society of Chemistry journal article supplement (doi:10.1039/c6ra04714a), 2016-01-01
Supplement: c6ra04714a1.pdf [file c6ra04714a1.pdf]

## Electronic Supplementary Information(ESI†)

### Coupled Cobalt Oxide/Hollow Carbon Sphere as an Efficient Electrocatalyst for Oxygen Reduction Reaction

Zongkun Chen,<sup>a</sup> Dandan He,<sup>a,b</sup> Xiujuan Xu,<sup>a</sup> Zhenzhen Liu,<sup>b</sup> Minghua Huang <sup>a\*</sup>,  
Xin Wang <sup>a\*</sup> and Heqing Jiang<sup>b</sup>

<sup>a</sup>Institute of Materials Science and Engineering, Ocean University of China, Qingdao 266100

<sup>b</sup>Institute of Biomass Energy and Processing, Chinese Academy of Sciences, Qingdao 266101

**Rotating disk electrode (RDE) and Rotating-ring disk electrode (RRDE) measurement.** An RRDE-3A (JAPAN) rotating ring disk electrode system was used for RDE and RRDE voltammetry experiments. A rotating GC disk-platinum ring electrode (4 mm diameter) was used as a working electrode. The oxygen reduction activities were measured by hydrodynamic voltammetry in an O<sub>2</sub>-saturated 0.1 M KOH at room temperature. The electrolyte solution was purged with oxygen gas for 30 min before the electrochemical measurement. A flow of O<sub>2</sub> was maintained over the electrolyte during the measurement to ensure O<sub>2</sub> atmosphere inside the cell. The electron transfer number from Koutecky-Levich plots were determined by the following equation.

$$1/J=1/J_L+1/J_K=1/(B\omega^{1/2})+1/J_K$$
$$B = 0.20nFC_0D_0^{2/3} \nu^{-1/6}$$

Where, J is the experimentally measured current, J<sub>L</sub> is the diffusion-limiting current, J<sub>K</sub> is the kinetic current, ω is the angular velocity, F is the Faraday constant, C<sub>0</sub> is the saturated concentration of O<sub>2</sub> in 0.1M KOH (1.2 x 10<sup>-6</sup> mol cm<sup>-3</sup>), D<sub>0</sub> is the diffusion coefficient of O<sub>2</sub> in 0.1M KOH (1.9 x10<sup>-5</sup> cm<sup>2</sup> s<sup>-1</sup>), and ν is the kinematic viscosity of the electrolyte.

The electron transfer number from RRDE experiment was determined by the following equation;

$$n = 4I_D/[I_D + (I_R/N)]$$

where, I<sub>D</sub> is the disk current, I<sub>R</sub> is the ring current, and N is the ring correction coefficient in RRDE experiment was determine to be 0.43 from the reduction of Fe(CN)<sub>6</sub><sup>4-/3-</sup> redox couple. The ring potential was held at 0.5 V vs. Ag/AgCl.

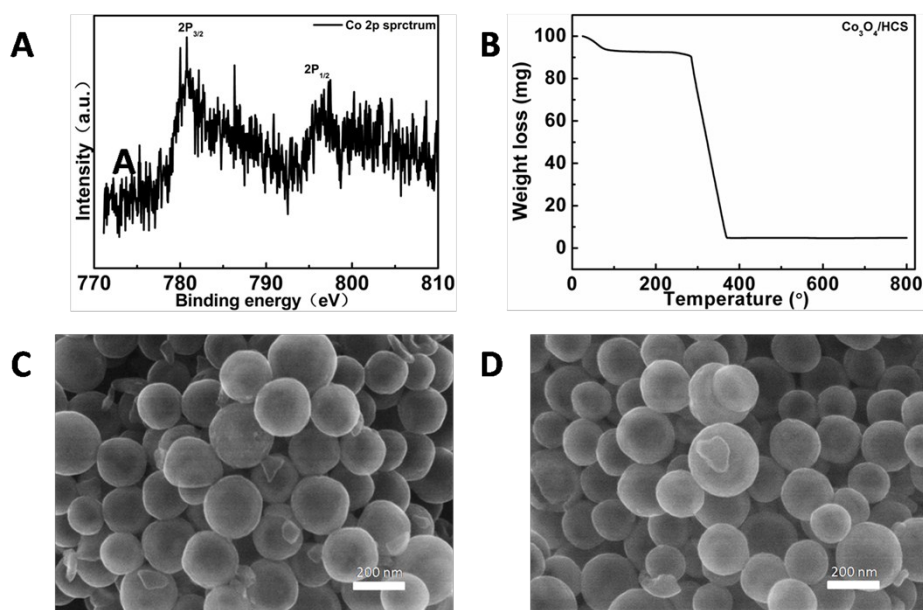

**Fig. S1.** (A) The high-resolution XPS spectrum of Co 2p for Co<sub>3</sub>O<sub>4</sub>/HCS. (B) TG curves of Co<sub>3</sub>O<sub>4</sub>/HCS. SEM images of HCS (C) and Co<sub>3</sub>O<sub>4</sub>/HCS (D).

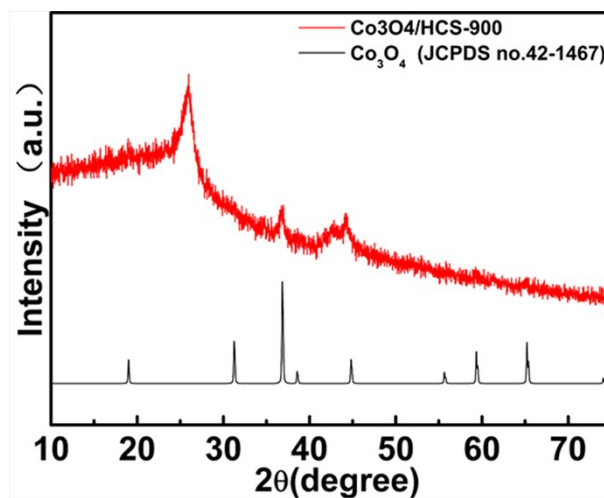

**Fig. S2.** XRD patterns of Co<sub>3</sub>O<sub>4</sub>/HCS at the calcination of 900°C.

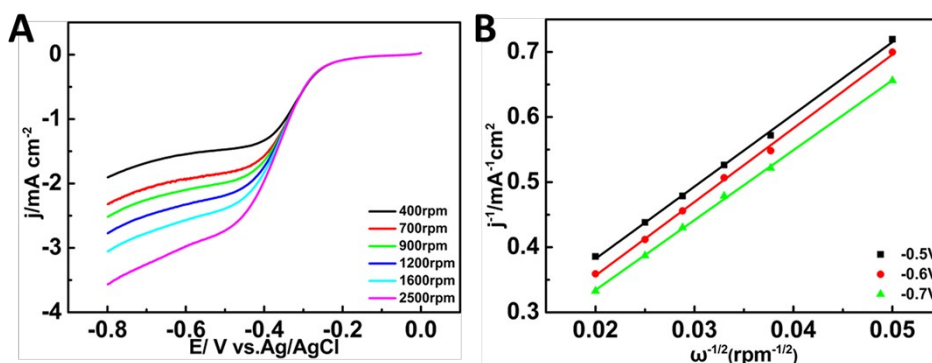

**Fig. S3.** (A) RDE voltammograms of HCS at different rotation rates. (B) Koutecky–Levich plots of the ORR for  $\text{Co}_3\text{O}_4/\text{HCS}$ .

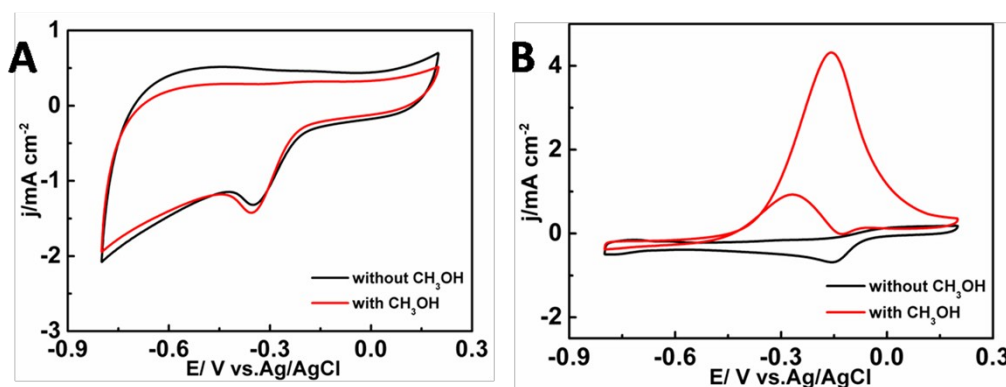

**Fig. S4.** CVs of  $\text{Co}_3\text{O}_4/\text{HCS}$  (A) and Pt/C (B) at  $50 \text{ mV s}^{-1}$  in  $\text{O}_2$ -saturated  $0.1 \text{ M}$  KOH solution with or without the addition of  $1.0 \text{ M}$  methanol.

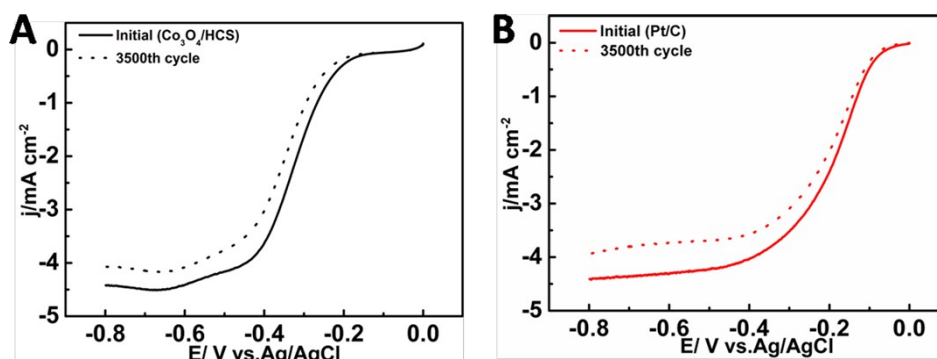

**Fig. S5.** Polarization curves of  $\text{Co}_3\text{O}_4/\text{HCS}$  (A) and Pt/C (B) measured during cycling durability tests at  $1600 \text{ rpm}$  in  $\text{O}_2$ -saturated  $0.1 \text{ M}$  KOH (cycling tests were carried

out in a potential window of -0.5 to -0.1 V vs. Ag/AgCl with 100 mV s<sup>-1</sup>).
